# Supplementary material for: Non-linear optical effects (SRS) in nanostructured polyaniline LED
Source: Royal Society of Chemistry journal article supplement (doi:10.1039/b926729h), 2010-01-01
Supplement: b926729h.pdf [file b926729h.pdf]

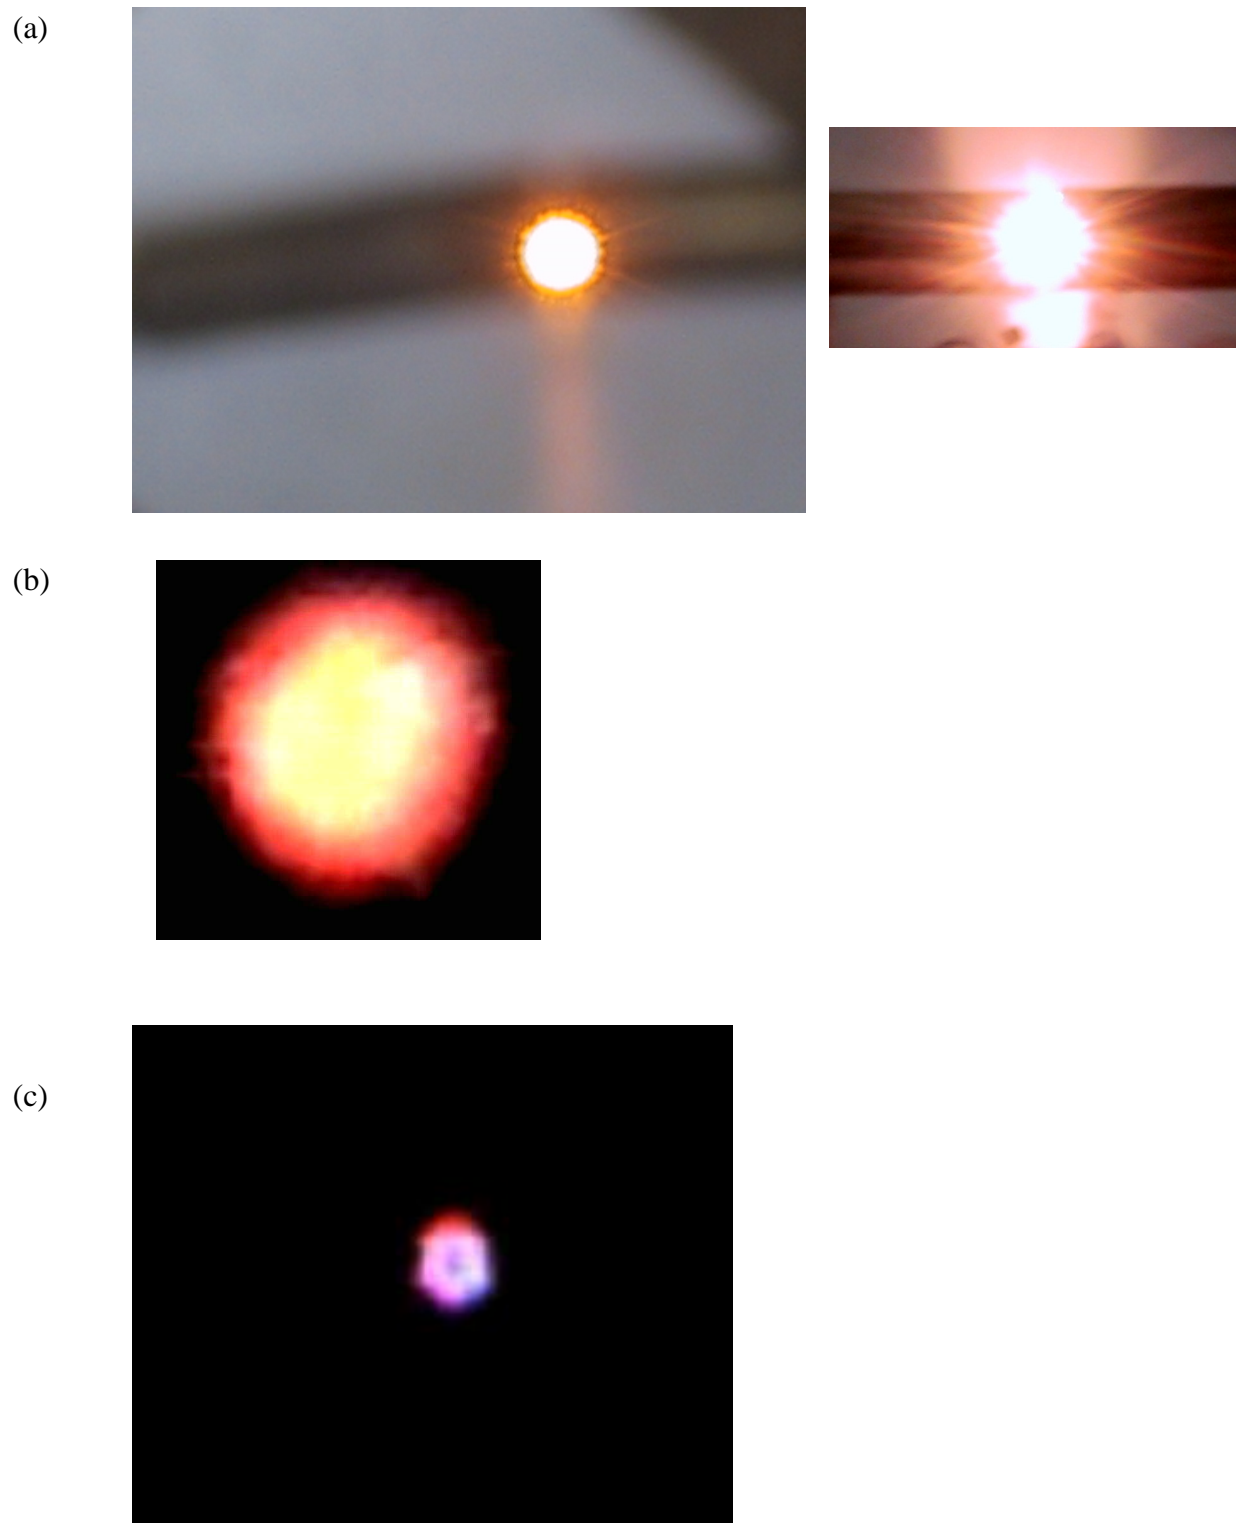

Fig. 1. NOEPLD in action (a) and beam profiles: (b) – partially filtered to reduce the intensity of the light (external SRS rings are not seen) and (c) – filtered with a “neutral dark” filter to show the central part of the beam profile.
